# Supplementary material for: Sugar phosphate-mediated inhibition of peptidoglycan precursor synthesis
Source: PubMed Central journal article supplement — bioRxiv. 2024 Nov 14:2024.11.13.623475. Preprint. [Version 1] doi: 10.1101/2024.11.13.623475 (PMC11601392; doi:10.1101/2024.11.13.623475), 2024-11-14
Supplement: NIHPP2024.11.13.623475v1-supplement-1.pdf [file NIHPP2024.11.13.623475v1-supplement-1.pdf]

770 **Supporting Information**

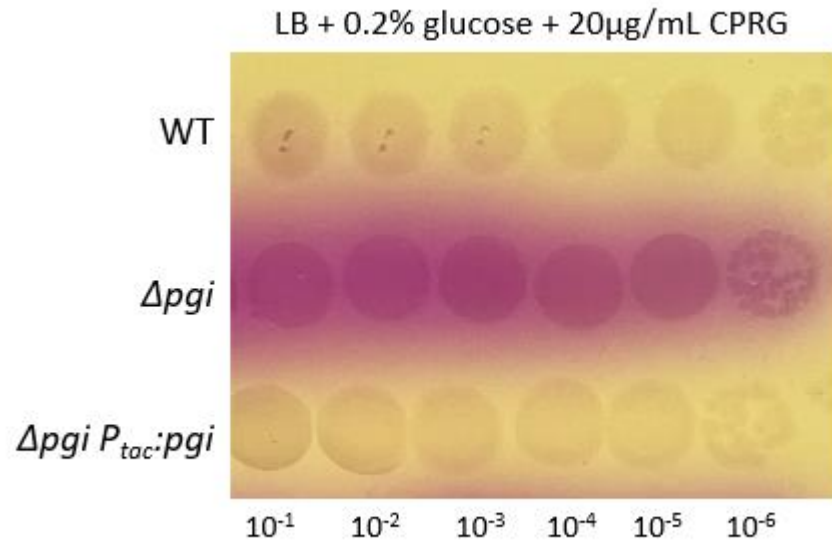

771

772 Figure S1: Enhanced lysis of a *pgi* mutant. Overnight cultures of the indicated strains  
773 were plated on agar containing glucose and the lysis indicator CPRG (see text for details)  
774 and imaged after 18 hours of growth.

775

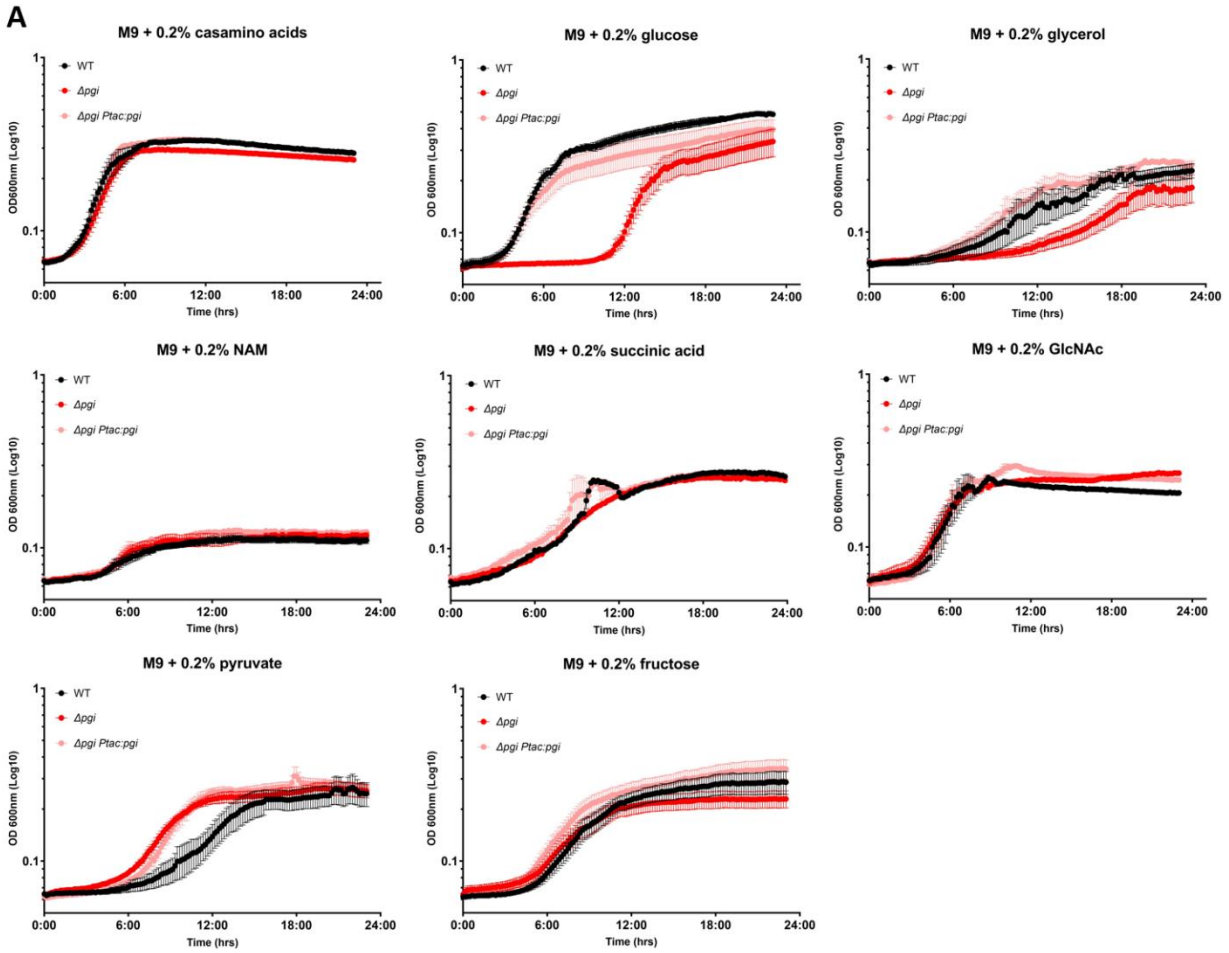

776

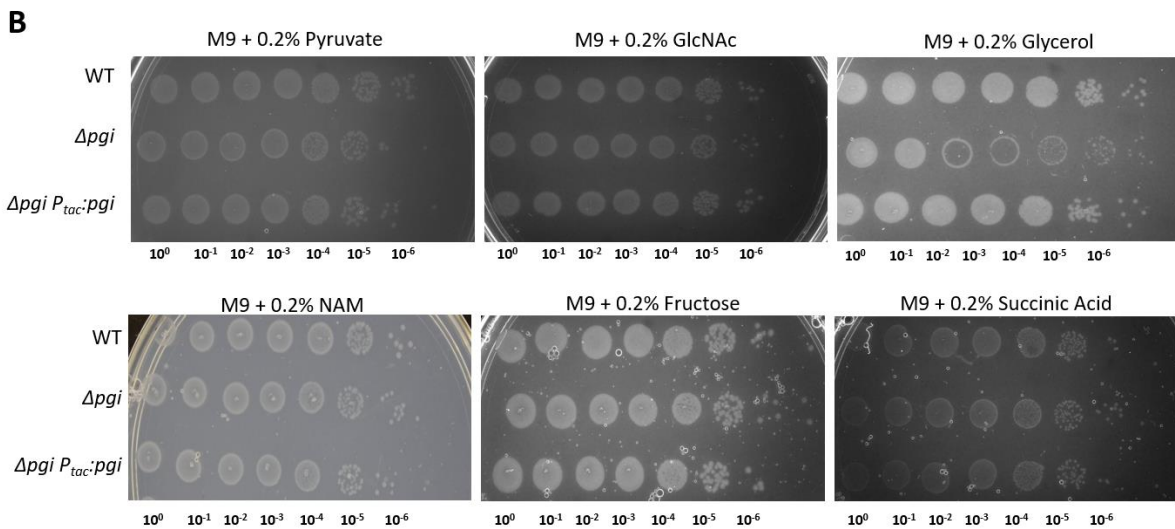

777

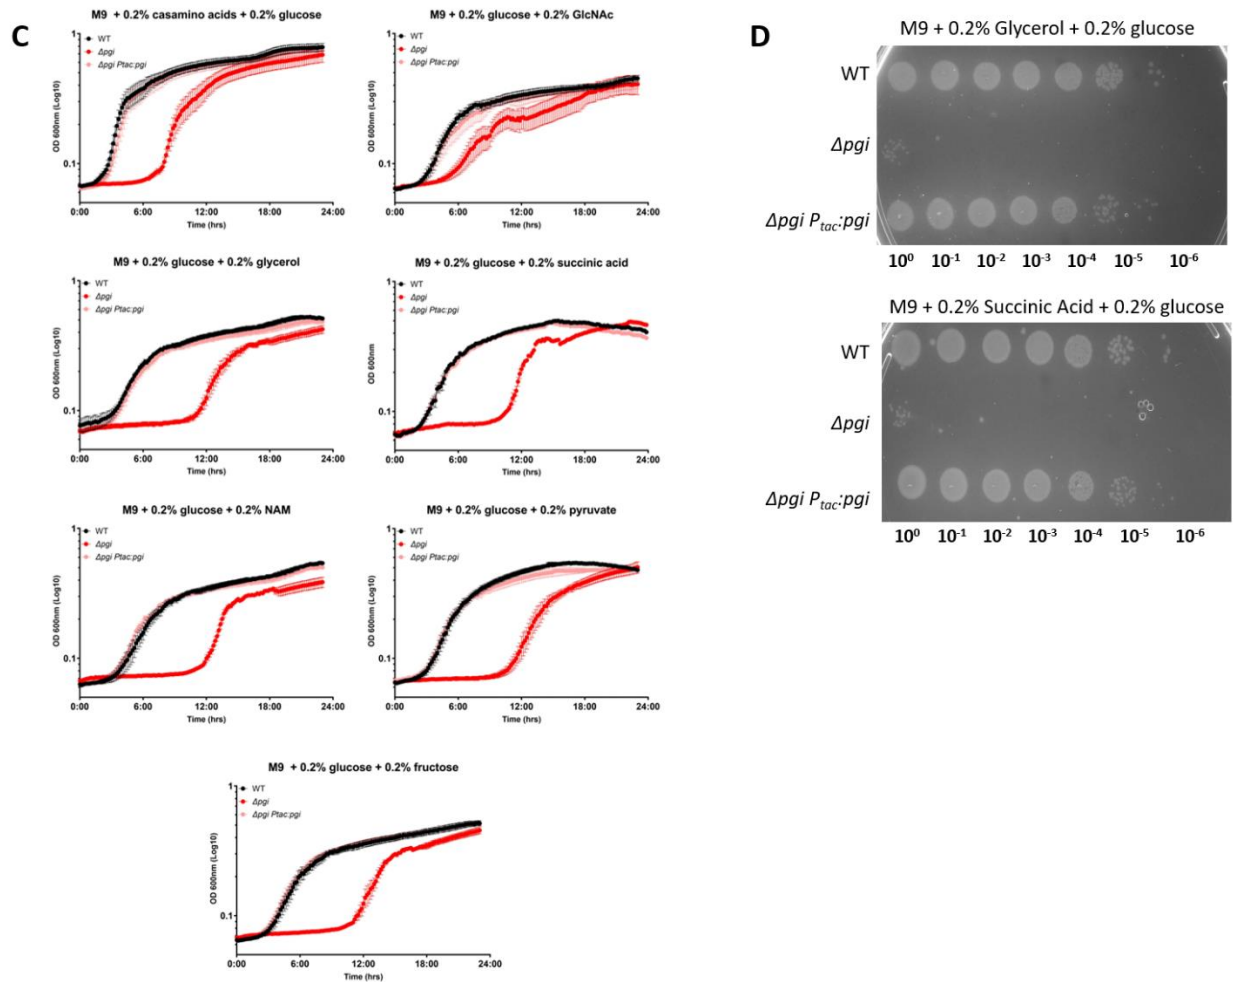

778

779 Figure S2: Ability of  $\Delta pgi$  to grow on various carbon sources. A) Growth curves with M9  
 780 minimal media and the indicated sole carbon sources. SEM plotted. B) Serial dilutions of  
 781 overnight cultures grown in M9 + 0.2%CAA plated on M9 agar supplemented with the  
 782 indicated carbon sources and grown for 18 hours at 37°C. C) Growth curves with M9  
 783 minimal media, designated carbon sources, and 0.2% glucose. SEM plotted. D) Serial  
 784 dilutions of overnight cultures grown in M9 + 0.2%CAA plated on M9 agar supplemented  
 785 with the designated carbon sources and 0.2% glucose.  
 786

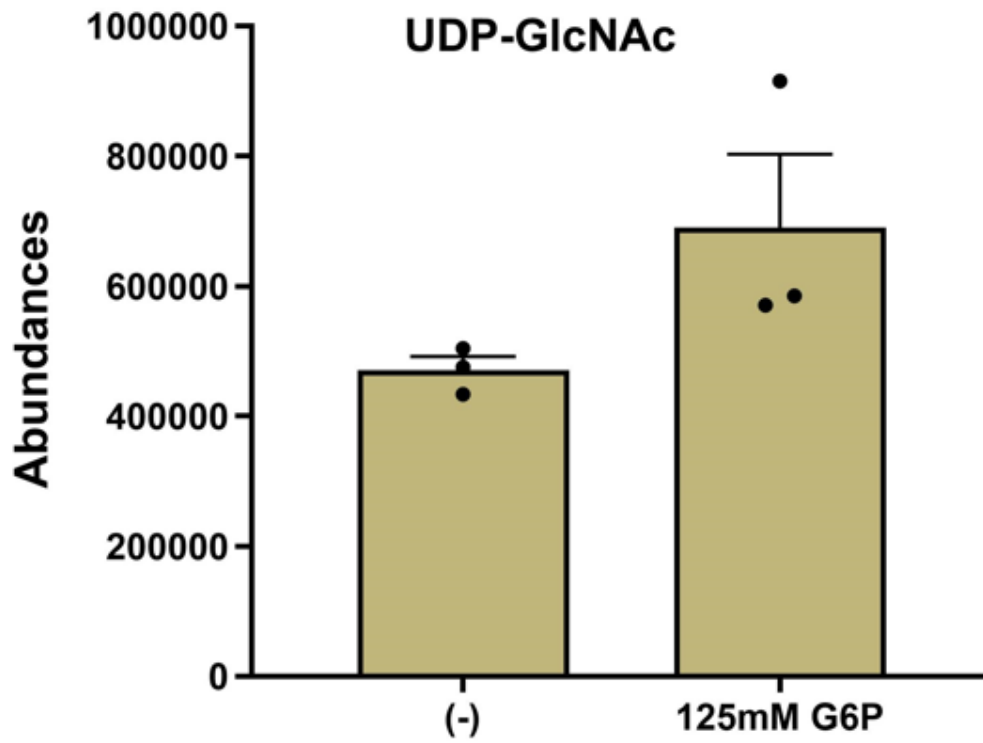

787

788 Figure S3: *In vitro* biochemical abundance of specified metabolites. UDP-GlcNAc levels  
789 measured with 125mM G1P addition. SEM plotted with 3 replicates displayed.

790

**A**

| Model | Polar interactions with Glucosamine-1-P                                                              | Length of bond (Å) – some residues form multiple bonds with Glucosamine-1-P | Predicted Template Modeling (pTM) score (confidence in structure) | Interface Predicted Template Modeling (ipTM) score (confidence in interface) |
|-------|------------------------------------------------------------------------------------------------------|-----------------------------------------------------------------------------|-------------------------------------------------------------------|------------------------------------------------------------------------------|
| 0     | Arg 330<br>Lys 348<br>Tyr 363<br>Asn 374<br>Asn 383 – this does not bind N in glucosamine<br>Lys 389 | 3.0<br>3.5<br>2.9, 3.6, 3.7<br>2.1<br>3.2, 3.3, 3.4<br>2.8, 3.0, 3.2, 3.3   | 0.9556                                                            | 0.9387                                                                       |
| 1     | Arg 330<br>Lys 348<br>Asn 359<br>Tyr 363<br>Asn 383<br>Lys 389                                       | 2.9<br>2.9<br>3.2<br>2.5<br>2.9<br>2.4, 3.5                                 | 0.9558                                                            | 0.9389                                                                       |
| 2     | Arg 330<br>Tyr 363<br>Asn 374<br>Asn 383<br>Lys 389                                                  | 2.9<br>2.4, 3.3, 3.4<br>2.0<br>3.2, 3.5<br>2.8                              | 0.9553                                                            | 0.9385                                                                       |
| 3     | Arg 330<br>Lys 348<br>Tyr 363<br>Asn 374<br>Asn 383 – this binds N in glucosamine<br>Lys 389         | 3.0<br>3.5<br>2.7, 2.9, 3.6<br>2.1<br>3.2, 3.3, 3.4<br>2.8, 3.0, 3.2, 3.3   | 0.9556                                                            | 0.9388                                                                       |
| 4     | Arg 330<br>Lys 348<br>Tyr 363<br>Asn 374<br>Asn 383<br>Lys 389                                       | 2.9, 3.4<br>2.8<br>2.5<br>1.9<br>3.5<br>2.8, 3.5                            | 0.9554                                                            | 0.9384                                                                       |

791

**B**

| Model | Polar interactions with Glucose-1-P                                                   | Length of bond (Å) – some residues form multiple bonds with Glucose-1-P       | Predicted Template Modeling (pTM) score (confidence in structure) | Interface Predicted Template Modeling (ipTM) score (confidence in interface) |
|-------|---------------------------------------------------------------------------------------|-------------------------------------------------------------------------------|-------------------------------------------------------------------|------------------------------------------------------------------------------|
| 0     | Lys 12*<br>Gly 13*<br>Asp 102<br>Asn 224                                              | 2.9<br>3.1, 3.4<br>3.5<br>3.2                                                 | 0.9553                                                            | 0.9382                                                                       |
| 1     | Leu 8*<br>Ala 10*<br>Lys 12*<br>Lys 22                                                | 3.3<br>3.5<br>3.5<br>2.7, 3.6                                                 | 0.9555                                                            | 0.9385                                                                       |
| 2     | Arg 330<br>His 360<br>Tyr 363<br>Asn 374<br>Asn 383<br>Lys 389                        | 2.4, 3.4<br>3.4<br>2.0<br>2.8, 3.2<br>3.3, 3.3<br>2.7, 3.4                    | 0.9548                                                            | 0.9375                                                                       |
| 3     | Lys 12*<br>Gly 13*<br>Lys 22<br>Gln 76<br>Asp 102<br>Asn 224                          | 2.6<br>3.0, 3.4<br>2.6, 3.5<br>3.3<br>2.9<br>3.0                              | 0.9552                                                            | 0.9382                                                                       |
| 4     | Arg 330<br>Lys 348<br>Asp 359<br>Tyr 363<br>Asn 374<br>Asn 383<br>Tyr 384*<br>Lys 389 | 3.3<br>3.5<br>3.0<br>2.6, 3.1<br>3.0, 3.3<br>2.9, 3.3, 3.4<br>3.1<br>3.1, 3.5 | 0.9549                                                            | 0.9376                                                                       |

C

| Model | Polar interactions with G6P                                                                       | Length of bond (Å) – some residues form multiple bonds with G6P                      | Predicted Template Modeling (pTM) score (confidence in structure) | Interface Predicted Template Modeling (ipTM) score (confidence in interface) |
|-------|---------------------------------------------------------------------------------------------------|--------------------------------------------------------------------------------------|-------------------------------------------------------------------|------------------------------------------------------------------------------|
| 0     | Asn 374<br>Ala 377 *<br>Asn 383<br>His 360<br>Asn 359<br>Arg 330<br>Lys 348<br>Tyr 363            | 3.1, 2.8<br>3.3<br>2.6, 2.9, 3.0<br>3.5, 3.4<br>3.5<br>2.3, 3.4<br>3.0<br>2.5        | 0.9332                                                            | 0.9083                                                                       |
| 1     | Ala 377 *<br>Asn 374<br>Ser 402<br>Asn 383<br>His 360<br>Tyr 363<br>Arg 330<br>Lys 348<br>Lys 389 | 3.3<br>2.9, 2.9<br>3.5<br>2.3, 3.0, 3.1<br>3.4<br>3.6, 2.7<br>3.4, 2.8<br>3.1<br>3.3 | 0.9342                                                            | 0.9099                                                                       |
| 2     | Asn 374<br>Asn 359<br>His 360<br>Arg 330<br>Tyr 363<br>Lys 348<br>Lys 389<br>Ser 402              | 2.2, 3.2, 3.6<br>2.8<br>3.5<br>2.6<br>1.9<br>3.5, 3.5<br>3.0<br>3.2                  | 0.9335                                                            | 0.9080                                                                       |
| 3     | Asn 383<br>Tyr 363<br>Arg 330<br>Asn 374<br>Val 375 *                                             | 3.1<br>3.1, 3.4<br>2.3<br>2.4, 3.0<br>3.1                                            | 0.9336                                                            | 0.9095                                                                       |
| 4     | Asn 383<br>Tyr 363<br>Arg 330<br>Lys 389<br>Asn 359<br>Asn 374<br>Ala 377 *                       | 2.9, 3.2<br>2.3<br>2.3, 3.5<br>3.3<br>3.0<br>2.8, 2.9<br>3.4                         | 0.9336                                                            | 0.9095                                                                       |

\*interaction with backbone, not side chain

D

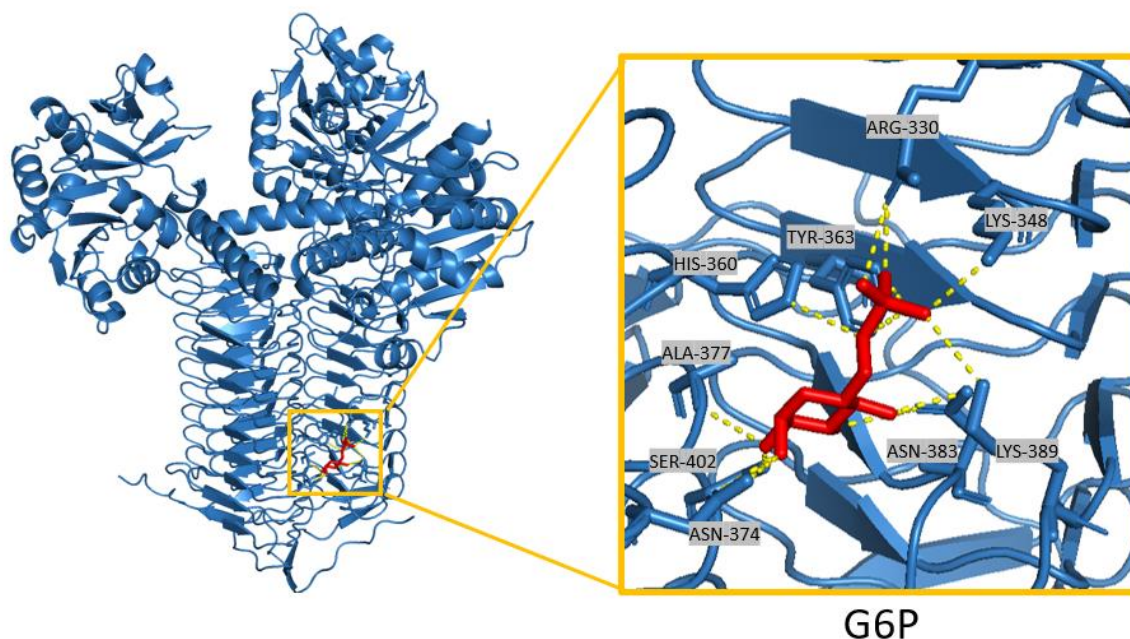

794

795 Figure S4: Predicted molecular models of GlmU. A) Predicted models of VCH GlmU with  
796 glucosamine-1P with interacting residues denoted, length of bonds, pTM and ipTM  
797 scores. Model #3 was the model used above. B) Predicted models of VCH GlmU with  
798 glucose-1P with interacting residues denoted, length of bonds, pTM and ipTM scores.  
799 Model #4 was the model used above. Highlighted in green are the same interacting  
800 residues as the substrate GlcN-1P. C) Predicted models of VCH GlmU with glucose-6P  
801 with interacting residues denoted, length of bonds, pTM and ipTM scores. Model #1 was  
802 the model used above. Highlighted in green are the same interacting residues as the  
803 substrate GlcN-1P. D) Molecular modeling of GlmU binding glucose-6P (red) and the  
804 associated polar interactions.



**A**

CLUSTAL O(1.2.4) multiple sequence alignment

```

sp|P9WHN3|GLMJ_MYCTU    MTFPGDTAVLVLAAGPGTRMRSDDPKVLTHTLAGRSHLSHVLAIAKLAPQRLIVVLGHDH  60
sp|P8ACC7|GLMJ_ECOLI    -MLNNMHSVVI LAAGKGRMYSDLPKVLTHTLAGKAPVQHVDAANELGAAHVHLVYGHGS  59
sp|Q9KIH7|GLMJ_VIBCH    ---MKFSTVILAAGKGRMHSNHPKVLTHTLAGKPHVHVITDTCNMLGAQNIHLVYGHGS  56
                          :.:***** :.:***** :.:***** :.:***** :.:*****

sp|P9WHN3|GLMJ_MYCTU    QRIAPLVGELADTLGRTIDVALQDRPLGTGHAVL CGLSALPDYAGHVVTSQREIPLDA  120
sp|P8ACC7|GLMJ_ECOLI    DLKKALK-----DDNLNMLVLAQELGTGHAMQQAAPFFADD - EDILMLYGDVPLTSV  111
sp|Q9KIH7|GLMJ_VIBCH    DQIQQAALA-----NIENMVLVLAQELGTGHAVDQASPHFQDD - EKILVLVYDVLTISE  108
                          :.:***** :.:***** :.:***** :.:*****

sp|P9WHN3|GLMJ_MYCTU    DTLADLIATHRAVSAAVTVLTTLDPPFGYGRILRTQDHEVMAIVEQTDATPSQREIREV  180
sp|P8ACC7|GLMJ_ECOLI    ETLQRLDQAKP--QGIGILLTVKLDPPTYGRITREN-GKVTGIVEHKDQDTEQRQIQEI  168
sp|Q9KIH7|GLMJ_VIBCH    DTIESLLEAQP--TDGIALLVLEDPYGRIVRKR-GPVVAIVEQKDASEEQKLIKEV   165
                          :*: * :. :. :*: * : * :* :* :* :* :* :* :* :* :* :* :* :* :* :*

sp|P9WHN3|GLMJ_MYCTU    NAGVYAFDIAALRSALSRLSNNAQQEYLYLTDVIAILRSDGQTVHSHVDDALVAGVIN  240
sp|P8ACC7|GLMJ_ECOLI    NTGILIANADMKRWLAKLTNNNAQGEYYITDIIALAYQEGREIVAVHPQRLSEVEGVIN  228
sp|Q9KIH7|GLMJ_VIBCH    NTGVLVATGRDLKRWLAGLNNAQGEYYLTDVIAAAHDEGRAVEAVHPSHSIEVEGVND  225
                          *: * :. :. :* :* :* :* :* :* :* :* :* :* :* :* :* :* :* :* :*

sp|P9WHN3|GLMJ_MYCTU    RVQLAEASELNRRVVAHQLAGVTVDPAITWIDVDVTIGRDVTIHPGTQLLGRTOIGG  300
sp|P8ACC7|GLMJ_ECOLI    RLQSLRLERVYQSEAEKLLLAGVMLRDPARFDLRLGTLHGRDVEIDTNVIEGNVTLGH  288
sp|Q9KIH7|GLMJ_VIBCH    RIQLARLERAFQARQAKLLAQVMLRDPARFDLRLGTLQCGSDVEIDVNVIIEGNVISGN  285
                          **:*: :. :. :* :* :* :* :* :* :* :* :* :* :* :* :* :* :* :* :*

sp|P9WHN3|GLMJ_MYCTU    RCVVGPDTLLTDVAVDGASVVR--THGSSSIIQDGAAGVPTVLRPGLTADGDKLGAFV  359
sp|P8ACC7|GLMJ_ECOLI    RVKIGTGCVIKNSVIGDCEISPYTVVEDANLAACTIGPFARLRPGAELLEGAVHGNFV  348
sp|Q9KIH7|GLMJ_VIBCH    NVVIGAGSILKDCIEDNTVIRPVSIEGATVGENCTVGFPTLRPGAELRDDAHVGNFV  345
                          :* :. :. :. :* :* :* :* :* :* :* :* :* :* :* :* :* :* :* :* :*

sp|P9WHN3|GLMJ_MYCTU    EVKNSTIGTGKVPHTLVYVDADIGEYSNIGASSVFVNYDGTSKRRTTVGSVRTGSDTH  419
sp|P8ACC7|GLMJ_ECOLI    EMKKNRLEKGSKAGHLYLGD AEI GDNWNVIGAGITTCNYDGANKFKTIIIGDDVFGSDTQ  408
sp|Q9KIH7|GLMJ_VIBCH    EMKNRLEKGSKAGHLYLGD AEI GDNWNVIGAGITTCNYDGANKFKTIIIGDDVFGSDCQ  405
                          *:* :. :* :* :* :* :* :* :* :* :* :* :* :* :* :* :* :* :* :* :*

sp|P9WHN3|GLMJ_MYCTU    FVAPVTIGDGAYTGAAGTVVREDVPPGALAVSAGPQRNIEHWQRKRGSPAAQASKRASE  479
sp|P8ACC7|GLMJ_ECOLI    LVAPVTVGKATIAAGTTVTRNVGENALAI SRVPQTKEGWRPVRVKKK-----  456
sp|Q9KIH7|GLMJ_VIBCH    LVAPVTIAGATIGAGTTLTKVVAEGELVITRAPERKIAGWQRPAKKK-----  453
                          :***** :* :* :* :* :* :* :* :* :* :* :* :* :* :* :* :* :* :* :*

sp|P9WHN3|GLMJ_MYCTU    MACQQPTQPPDADQTP  495
sp|P8ACC7|GLMJ_ECOLI    -----  456
sp|Q9KIH7|GLMJ_VIBCH    -----  453

```

**B**

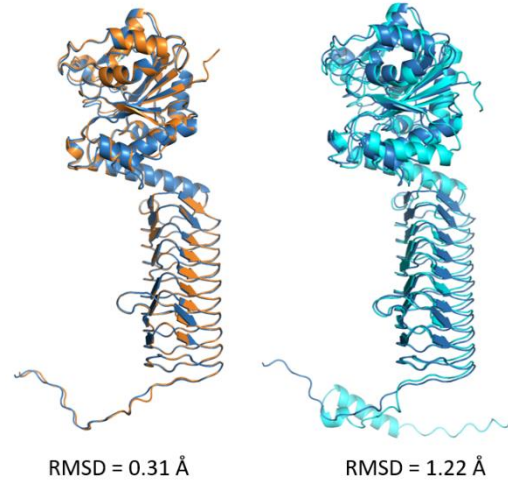

**C**

|         | M. TB | E. coli | VCH   |
|---------|-------|---------|-------|
| M. TB   | 100   | 38.68   | 40.04 |
| E. coli | 38.68 | 100     | 67.55 |
| VCH     | 40.04 | 67.55   | 100   |

805  
806  
807  
808  
809  
810  
811  
812  
813

Figure S5: Structural alignments of GlmU. A) Multiple amino-acid sequence alignments of *M. Tb*, *E. coli*, and *V. cholerae* with conserved residues denoted, using Clustal. B) GlmU monomer structural alignment. GlmU<sup>VC</sup> is blue, GlmU<sup>EC</sup> is depicted in orange, and GlmU<sup>Mtb</sup> is in teal. RMSD, root mean squared deviation, is a measure of how closely two alignments match; RMSD < 2.5 is a reasonable alignment. C) Percent Identity Matrix, created by Clustal2.1 shows alignment similarity across species.

| Strain | Description                                           | Source or Reference                  |
|--------|-------------------------------------------------------|--------------------------------------|
| WT*    | Wild-type <i>V. cholerae</i> N16961 El Tor            | Heidelberg JF, <i>et. al.</i> , 2000 |
| MK1*   | $\Delta pgi$ (vc0374)                                 | Keller MK, <i>et. al.</i> , 2023     |
| MK4    | $\Delta pgi$ P <sub>tac</sub> - <i>pgi</i>            | Keller MK, <i>et. al.</i> , 2023     |
| MK12   | $\Delta pgi$ P <sub>tac</sub> - <i>nagB</i> (vca1025) | This study                           |
| MK13*  | $\Delta pgi$ $\Delta pgcA$ (vc2095)                   | This study                           |
| MK14   | $\Delta pgi$ P <sub>tac</sub> - <i>pgcA</i>           | This study                           |
| MK15   | $\Delta pgi$ P <sub>tac</sub> - <i>glmS</i> (vc0487)  | This study                           |
| MK16   | $\Delta pgi$ pHL: <i>glmU</i> (vc2762)                | This study                           |
| MK110  | <i>E. coli</i> SM10 $\lambda$ pir conjugation strain  | Ferrières L, <i>et. al.</i> , 2010   |
| MK120  | <i>E. coli</i> MFD pir conjugation strain             | Ferrières L, <i>et. al.</i> , 2010   |
| MK130  | <i>E. coli</i> BL21 protein purification strain       | Novagen                              |

\* = checked via whole genome sequencing

814

815 Table S1: Strain list used in this study. \* = checked via whole genome sequencing

| Plasmid                               | Description                                                                                 | Source or reference       |
|---------------------------------------|---------------------------------------------------------------------------------------------|---------------------------|
| pTD101                                | chromosomal lacZ insertion with IPTG induction                                              | Obando MA, et. al., 2024  |
| pTOX5                                 | gene deletion construct                                                                     | Lazarus JE, et. al., 2019 |
| pET28a                                | 6xHIS-SUMO tagged protein purification vector                                               | Obando MA, et. al., 2024  |
| pHL100mob                             | Non-integrative, high copy number plasmid with IPTG induction.                              | Mett H, et. al., 1980     |
| pTD101 P <sub>tac</sub> - <i>nagB</i> | <i>nagB</i> overexpression with whole gene amplification using primers 7 and 8              | This study                |
| pTD101 P <sub>tac</sub> - <i>pgcA</i> | <i>pgcA</i> overexpression with whole gene amplification using primers 9 and 10             | This study                |
| pTD101 P <sub>tac</sub> - <i>glmS</i> | <i>glmS</i> overexpression with whole gene amplification using primers 11 and 12            | This study                |
| pHL100mob: <i>glmU</i>                | <i>glmU</i> overexpression with whole gene amplification using primers 13 and 14            | This study                |
| pET28a <i>glmU</i>                    | GlmU protein purification strain                                                            | This study                |
| pTOX <i>pgcA</i>                      | <i>pgcA</i> deletion by amplifying 500bp up and down stream of the gene using primers 15-18 | This study                |

  

| Primer description      | Sequence (5'-3')                                            | Number |
|-------------------------|-------------------------------------------------------------|--------|
| pTD101fwd               | ggcaaatattctgaaatgagctgt                                    | 1      |
| pTD1010rev              | cCAGATCTTAATTAAGGtgcttct                                    | 2      |
| pTOXfwd                 | tcgctcgaaacctg                                              | 3      |
| pTOXrev                 | gatcgagctcgagacg                                            | 4      |
| pHL100fwd               | cggataacaatttcacacagga                                      | 5      |
| pHL100rev               | gctgaaaatcttctcatccgc                                       | 6      |
| <i>nagB</i> pTD101fwd   | aacagaccatggaattcgagctcggtaccAGGAGGctgactgaATGAGACTTATCC    | 7      |
| <i>nagB</i> pTD101rev   | atgcctgcaggtcgactctagaggatccccTTAGAAGCCTAC                  | 8      |
| <i>pgcA</i> pTD101fwd   | aacagaccatggaattcgagctcggtaccAGGAGGctgactgaATGGCTATGCACCCCT | 9      |
| <i>pgcA</i> pTD101rev   | CGTG                                                        | 10     |
| <i>glmS</i> pTD101fwd   | atgcctgcaggtcgactctagaggatccccTTATAAACCCGCGTCTTTAAACTTGGT   | 11     |
| <i>glmS</i> pTD101rev   | TTACG                                                       | 12     |
| <i>glmU</i> pHL100fwd   | aacagaccatggaattcgagctcggtaccAGGAGGctgactgaATGTGTGGAATTGTT  | 13     |
| <i>glmU</i> pHL100rev   | GGTGC                                                       | 14     |
| <i>pgcA</i> up500fwd    | atgcctgcaggtcgactctagaggatccccTACTCGACAGTTACCGCTTTAG        | 15     |
| <i>pgcA</i> up500rv     | aacagaccatggaattcgagctcggtaccAGGAGGctgactgaATGAAATTCAGTACG  | 16     |
| <i>pgcA</i> dwn500fwd   | GTAATTCTCG                                                  | 17     |
| <i>pgcA</i> dwn500rev   | atgcctgcaggtcgactctagaggatccccTATTTCCTTTTCGCCGACGCTGC       | 18     |
| <i>pgcA</i> flankfwd    | ggcggggtttttctgtgatcacgtacgatCGAAAGGGATAGTCGTAAGCAAAGATGC   | 19     |
| <i>pgcA</i> flankrev    | TCATCATTACTCGAGTGCGCCGCATTAAGTGACATCCTTTCTTTAAATTT          | 20     |
| <i>pgcA</i> internalfwd | CACATAAAATAAAACC                                            | 21     |
| <i>pgcA</i> internalrev | TAATGCGGCCGCACTCGAGTAATAATGATGATGTGATGAAATGAATCAGG          | 22     |
| MK chromolacZfw         | CTTGCCTGCCGAGTTGAGT                                         | 23     |
| MK chromolacZrev        | CTGCCACTGGTAATGCGAGC                                        | 24     |

816

817 Table S2: Oligos used in this study.

818
